# Supplementary material
Source: PubMed Central journal article supplement (PMC4895232)
Supplement: NIHMS790820-supplement-Suppl_figures.pdf [file NIHMS790820-supplement-Suppl_figures.pdf]

# Supplemental Figure Legends

- **Supplemental Figure S1.** Flow diagram showing the reasons for exclusion from the analyzed cohort.
- **Supplemental Figure S2.** Landmark analysis for overall survival according to presence of central nervous system metastases at 1 year after initial diagnosis of metastatic breast cancer.

## Supplemental Figure 1

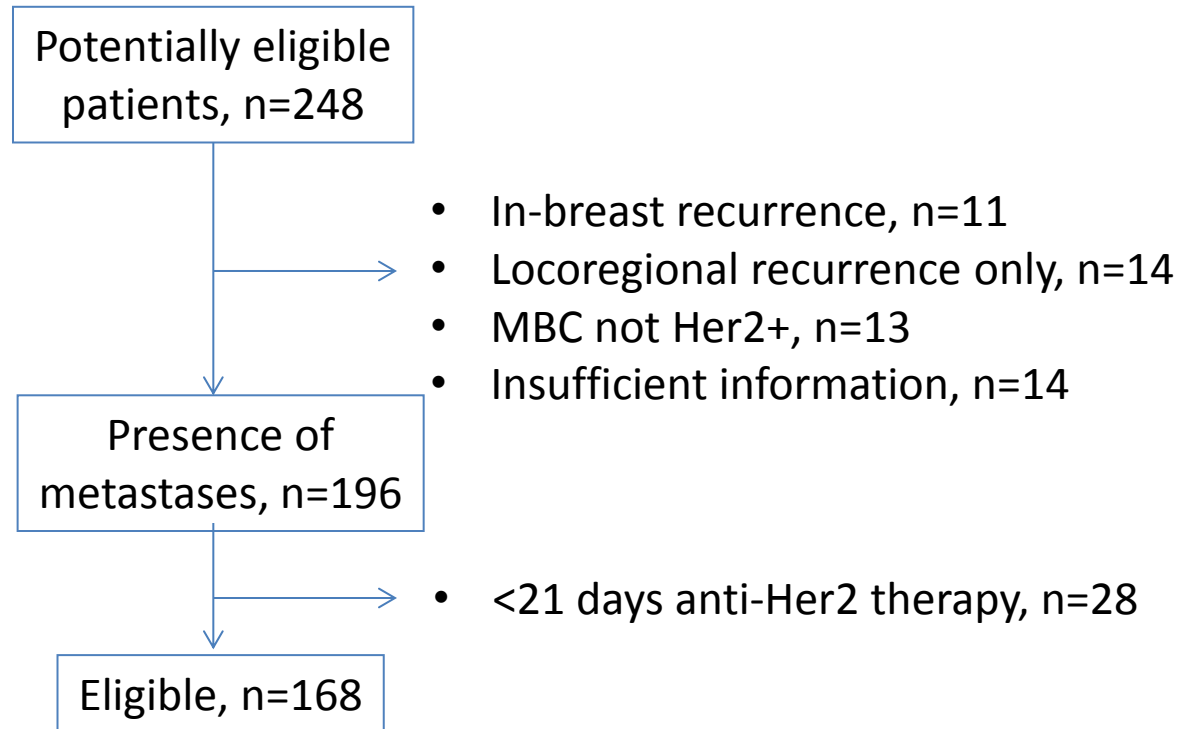

Supplemental Figure S2

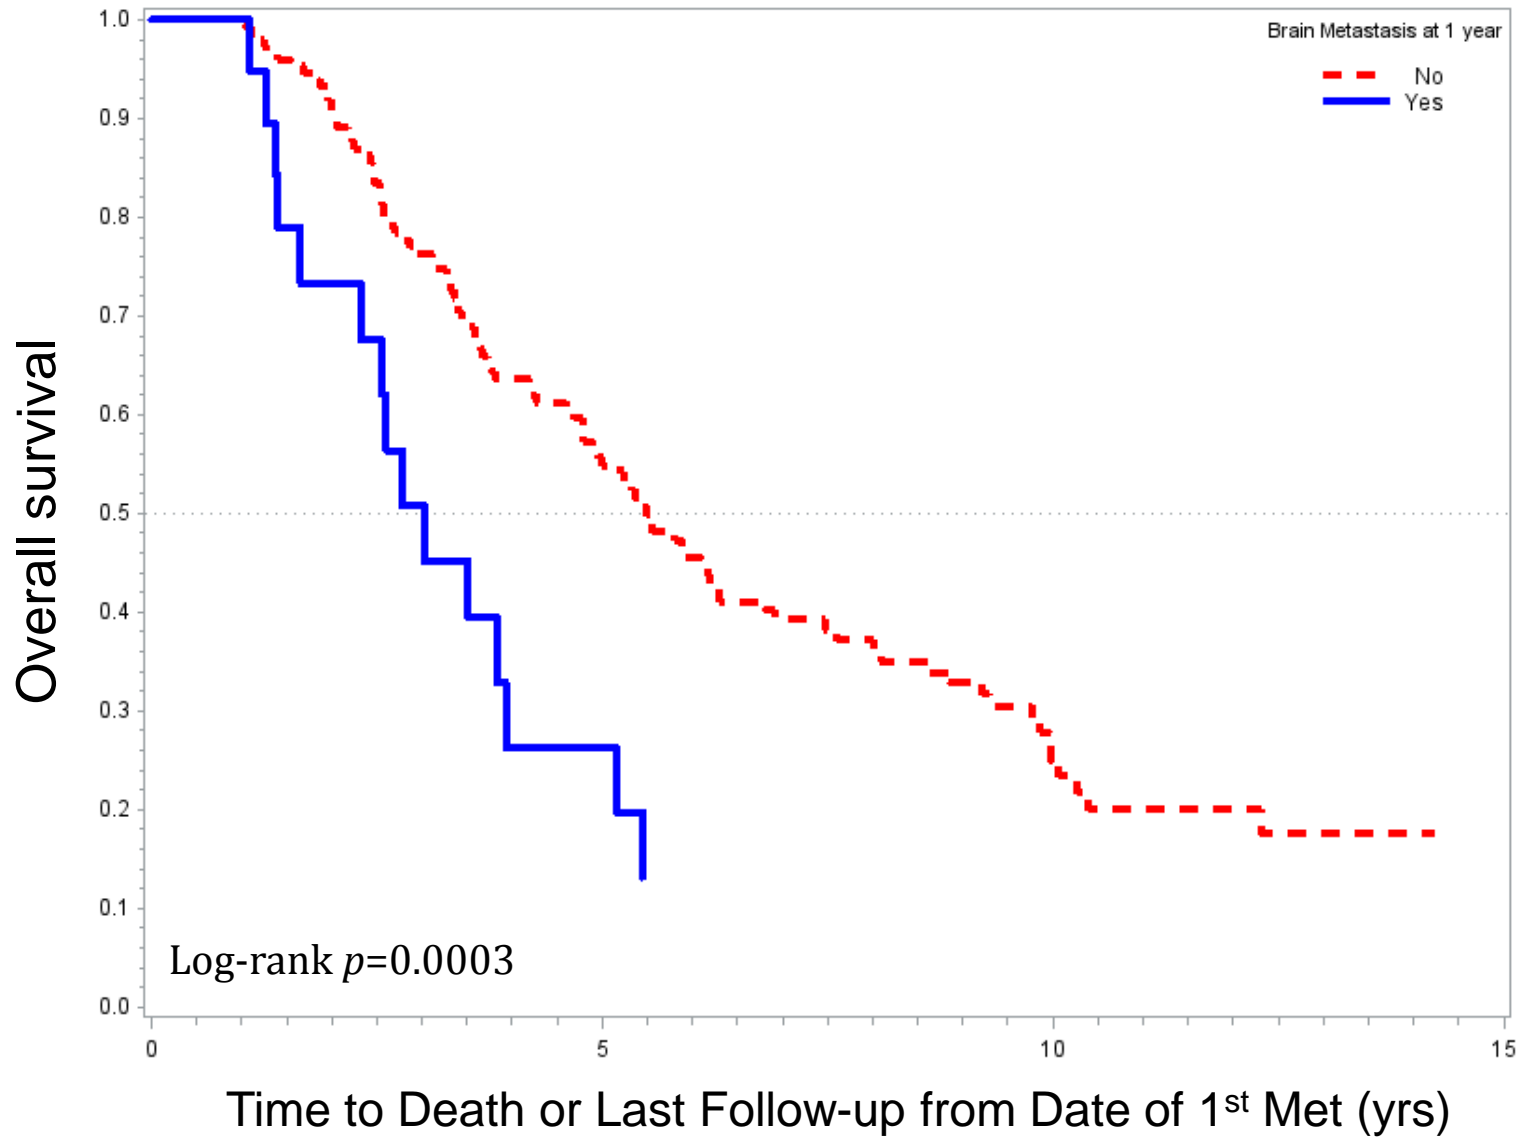

CNS met

| CNS met at 1 yr: | No | 128 | 110 | 66 | 39 | 27 | 11 | 5 |
|------------------|----|-----|-----|----|----|----|----|---|
| Yes              | 27 | 16  | 5   | 2  | 2  | 1  | 1  |   |
